# Supplementary material
Source: MDPI journal article supplement (https://www.mdpi.com/search?q=ijms-17-00525)
Supplement: s001 [file ijms-17-00525-s001.pdf]

# Supplementary Materials: Is It Reliable to Use Common Molecular Docking Methods for Comparing the Binding Affinities of Enantiomer Pairs for Their Protein Target?

David Ramírez and Julio Caballero

Table S1. Ligand dataset collection of enantiomers.

| Target   | Compound ID                                | Activity                 |                          | Reference                |      |
|----------|--------------------------------------------|--------------------------|--------------------------|--------------------------|------|
|          |                                            | R/(+)                    | S/(-)                    |                          |      |
| hAChE    | VX                                         | $1.180 \times 10^{-2}$ a | 1.370 a                  | [52]                     |      |
|          | nc-VX                                      | $2.000 \times 10^{-6}$ a | $1.100 \times 10^{-4}$ a | [52]                     |      |
|          | Bambuterol                                 | $4.300 \times 10^2$ a    | $1.600 \times 10^{-1}$ a | [37]                     |      |
|          | a(EMP-CHMC)                                | $1.200 \times 10^6$ a    | $2.800 \times 10^7$ a    | [33]                     |      |
|          | b(nPrMP-CHMC)                              | $6.100 \times 10^6$ a    | $1.580 \times 10^8$ a    | [33]                     |      |
|          | 1                                          | $2.000 \times 10^2$ b    | $1.000 \times 10^4$ b    | [48]                     |      |
|          | 2                                          | $2.600 \times 10^1$ b    | $8.000 \times 10^1$ b    | [48]                     |      |
|          | 3                                          | $1.422 \times 10^2$ b    | $1.020 \times 10^2$ b    | [48]                     |      |
|          | HupA                                       | $3.153 \times 10^3$ c    | $6.500 \times 10^1$ c    | [58]                     |      |
|          | 18a                                        | $1.400 \times 10^1$ c    | $6.090 \times 10^2$ c    | [55]                     |      |
|          | Malaoxon                                   | $1.270 \times 10^5$ a    | $1.090 \times 10^4$ a    | [53]                     |      |
|          | Dizocilpine                                | $2.000 \times 10^{-1}$ b | $6.200 \times 10^{-3}$ b | [42]                     |      |
|          | Cycloheptyl-CH <sub>3</sub>                | $7.600 \times 10^2$ a    | $2.200 \times 10^5$ a    | [35]                     |      |
|          | Cycloheptyl-C <sub>2</sub> H <sub>5</sub>  | $1.400 \times 10^1$ a    | $6.500 \times 10^4$ a    | [35]                     |      |
|          | Cycloheptyl-C <sub>4</sub> H <sub>9</sub>  | $3.200 \times 10^1$ a    | $9.400 \times 10^4$ a    | [35]                     |      |
|          | Cycloheptyl-C <sub>5</sub> H <sub>11</sub> | $1.290 \times 10^2$ a    | $3.400 \times 10^5$ a    | [35]                     |      |
|          | Cycloheptyl-C <sub>6</sub> H <sub>13</sub> | $1.140 \times 10^2$ a    | $2.900 \times 10^5$ a    | [35]                     |      |
|          | Isopropyl-CH <sub>3</sub>                  | $1.500 \times 10^1$ a    | $3.170 \times 10^2$ a    | [35]                     |      |
|          | Isopropyl-C <sub>2</sub> H <sub>5</sub>    | $2.900 \times 10^1$ a    | $7.500 \times 10^1$ a    | [35]                     |      |
|          | Isopropyl-C <sub>5</sub> H <sub>11</sub>   | $2.600 \times 10^3$ a    | $1.500 \times 10^3$ a    | [35]                     |      |
|          | Isopropyl-C <sub>6</sub> H <sub>13</sub>   | $3.000 \times 10^1$ a    | $3.600 \times 10^3$ a    | [35]                     |      |
|          | Cycloheptyl                                | $1.400 \times 10^6$ a    | $3.000 \times 10^8$ a    | [35]                     |      |
|          | Isopropyl                                  | $8.700 \times 10^4$ a    | $1.300 \times 10^7$ a    | [35]                     |      |
|          | 3,3-Dimethylbutyl                          | $3.300 \times 10^7$ a    | $1.000 \times 10^9$ a    | [35]                     |      |
|          | Limonene                                   | $2.200 \times 10^{-1}$ d | $2.500 \times 10^{-1}$ d | [51]                     |      |
|          | Terpinen-4-ol                              | $2.440 \times 10^{-1}$ d | $2.140 \times 10^{-1}$ d | [51]                     |      |
|          | Carvone                                    | $1.850 \times 10^6$ c    | $1.380 \times 10^6$ c    | [51]                     |      |
|          | Profenofos                                 | $1.000 \times 10^3$ c    | $7.180 \times 10^4$ c    | [43]                     |      |
|          | Crotoxyphos                                | $1.900 \times 10^3$ c    | $1.000 \times 10^3$ c    | [43]                     |      |
|          | mAChE                                      | Bambuterol               | $7.900 \times 10^2$ a    | $7.700 \times 10^{-1}$ a | [37] |
|          |                                            | P-CHMPTCh                | $8.100 \times 10^{-1}$ a | $1.900 \times 10^2$ a    | [47] |
|          |                                            | iPrMPTCh                 | $1.400 \times 10^{-1}$ a | $1.600 \times 10^1$ a    | [47] |
| DMBMPTCh |                                            | $1.900 \times 10^1$ a    | $3.600 \times 10^2$ a    | [47]                     |      |
| hBChE    | Bambuterol                                 | $6.400 \times 10^6$ a    | $1.200 \times 10^6$ a    | [37]                     |      |
|          | HupA                                       | $2.829 \times 10^5$ c    | $5.363 \times 10^4$ c    | [58]                     |      |
|          | Malaoxon                                   | $1.460 \times 10^4$ a    | $4.240 \times 10^3$ a    | [53]                     |      |
|          | Dizocilpine                                | $4.500 \times 10^{-1}$ b | $1.790 \times 10^{-2}$ b | [42]                     |      |

Table S1. Cont.

| Target | Compound ID              | Activity                 |                          | Reference |
|--------|--------------------------|--------------------------|--------------------------|-----------|
|        |                          | R/(+)                    | S/(-)                    |           |
| hMAO-A | PwTx-I                   | $3.900 \times 10^4$ c    | $3.400 \times 10^4$ c    | [54]      |
|        | 11a–11b                  | $3.900 \times 10^1$ c    | $2.400 \times 10^1$ c    | [56]      |
|        | 11c–11d                  | $1.370 \times 10^3$ c    | $1.540 \times 10^3$ c    | [56]      |
|        | 11g–11h                  | $3.700 \times 10^1$ c    | $2.500 \times 10^1$ c    | [56]      |
|        | 11i–11j                  | $6.500 \times 10^2$ c    | $7.000 \times 10^1$ c    | [56]      |
|        | 3a–3b                    | $1.330 \times 10^2$ b    | $5.840 \times 10^2$ b    | [36]      |
|        | 4a–4b                    | $1.690 \times 10^2$ b    | $6.140 \times 10^2$ b    | [36]      |
|        | 5a–5b                    | $1.130 \times 10^1$ b    | $1.816 \times 10^2$ b    | [36]      |
|        | FLA 336                  | $9.000 \times 10^{-1}$ b | $4.000 \times 10^{-1}$ b | [39]      |
|        | 7–8                      | 4.800 c                  | 6.800 c                  | [40]      |
|        | 3                        | $3.100 \times 10^1$ b    | $2.840 \times 10^2$ b    | [34]      |
|        | 7                        | $7.700 \times 10^1$ b    | $1.600 \times 10^2$ b    | [34]      |
|        | 9                        | 6.000 b                  | $1.860 \times 10^2$ b    | [34]      |
|        | 11                       | 2.000 b                  | $1.020 \times 10^2$ b    | [34]      |
|        | 1                        | $1.300 \times 10^{-2}$ b | $5.000 \times 10^{-2}$ b | [38]      |
|        | 4                        | $1.200 \times 10^{-2}$ b | $5.000 \times 10^{-3}$ b | [38]      |
|        | SAL                      | $3.610 \times 10^1$ b    | $8.130 \times 10^1$ b    | [50]      |
|        | NM-SAL                   | $3.790 \times 10^1$ b    | $1.495 \times 10^2$ b    | [50]      |
|        | 5–6                      | $7.300 \times 10^{-1}$ b | 2.600 b                  | [57]      |
|        | 7–8                      | 1.800 b                  | 1.100 b                  | [57]      |
| 11–12  | 1.300 b                  | $6.900 \times 10^{-1}$ b | [57]                     |           |
| 13–14  | $1.800 \times 10^{-1}$ b | $7.200 \times 10^{-1}$ b | [57]                     |           |
| mMAO-A | Amphetamine              | $2.030 \times 10^2$ b    | $3.380 \times 10^1$ b    | [39]      |
|        | Methamphetamine          | $9.900 \times 10^1$ b    | $1.100 \times 10^2$ b    | [39]      |
|        | Deprenyl                 | $7.600 \times 10^1$ b    | $1.400 \times 10^1$ b    | [39]      |
| hMAO-B | PwTx-I                   | $1.500 \times 10^4$ c    | $8.000 \times 10^3$ c    | [54]      |
|        | 11a–11b                  | $1.229 \times 10^4$ c    | $1.681 \times 10^4$ c    | [56]      |
|        | 11c–11d                  | $2.900 \times 10^4$ c    | $8.470 \times 10^4$ c    | [56]      |
|        | 11g–11h                  | $1.917 \times 10^4$ c    | $2.120 \times 10^4$ c    | [56]      |
|        | 11i–11j                  | $3.400 \times 10^4$ c    | $8.007 \times 10^4$ c    | [56]      |
|        | 3a–3b                    | $1.410 \times 10^1$ b    | $1.560 \times 10^2$ b    | [36]      |
|        | 4a–4b                    | $4.780 \times 10^1$ b    | $1.490 \times 10^2$ b    | [36]      |
|        | 5a–5b                    | $2.490 \times 10^1$ b    | $4.490 \times 10^1$ b    | [36]      |
|        | FLA 336                  | $2.500 \times 10^1$ b    | $2.100 \times 10^{-2}$ b | [39]      |
|        | 7–8                      | $1.000 \times 10^1$ b    | 2.700 b                  | [40]      |
|        | 1                        | $2.700 \times 10^{-3}$ b | $1.000 \times 10^{-3}$ b | [38]      |
|        | 4                        | 1.400 b                  | 2.400 b                  | [38]      |

Table S1. Cont.

| Target      | Compound ID           | Activity                              |                                       | Reference |
|-------------|-----------------------|---------------------------------------|---------------------------------------|-----------|
|             |                       | R/(+)                                 | S/(-)                                 |           |
|             | SS(R)SS–SS(S)SS       | 1.100 <sup>c</sup>                    | 1.500 <sup>c</sup>                    | [49]      |
|             | S(R)SSS–S(S)SSS       | 1.200 <sup>c</sup>                    | 1.500 <sup>c</sup>                    | [49]      |
|             | SRRS(R)–SRRS(S)       | 3.980 × 10 <sup>1</sup> <sup>c</sup>  | 3.300 <sup>c</sup>                    | [49]      |
|             | SSSS(R)–SSSS(S)       | 1.220 × 10 <sup>1</sup> <sup>c</sup>  | 1.500 <sup>c</sup>                    | [49]      |
|             | S(R)RSR–S(S)RSR       | 3.980 × 10 <sup>1</sup> <sup>c</sup>  | 2.940 × 10 <sup>1</sup> <sup>c</sup>  | [49]      |
|             | SRS(R)R–SRS(S)R       | 1.000 × 10 <sup>5</sup> <sup>c</sup>  | 5.400 × 10 <sup>1</sup> <sup>c</sup>  | [49]      |
|             | RR(R)SS–RR(S)SS       | 1.000 × 10 <sup>5</sup> <sup>c</sup>  | 1.080 × 10 <sup>2</sup> <sup>c</sup>  | [49]      |
|             | SSS(R)S–SSS(S)S       | 1.100 × 10 <sup>3</sup> <sup>c</sup>  | 1.500 <sup>c</sup>                    | [49]      |
|             | (R)SSSS–(S)SSSS       | 1.900 × 10 <sup>3</sup> <sup>c</sup>  | 1.500 <sup>c</sup>                    | [49]      |
|             | SS(R)RR–SS(S)RR       | 2.600 × 10 <sup>3</sup> <sup>c</sup>  | 1.000 × 10 <sup>5</sup> <sup>c</sup>  | [49]      |
|             | RRS(R)R–RRS(S)R       | 1.000 × 10 <sup>5</sup> <sup>c</sup>  | 5.500 × 10 <sup>3</sup> <sup>c</sup>  | [49]      |
|             | S(R)RRS–S(S)RRS       | 3.980 × 10 <sup>1</sup> <sup>c</sup>  | 7.100 × 10 <sup>3</sup> <sup>c</sup>  | [49]      |
|             | RR(R)RS–RR(S)RS       | 1.000 × 10 <sup>5</sup> <sup>c</sup>  | 7.800 × 10 <sup>3</sup> <sup>c</sup>  | [49]      |
|             | R(R)RRR–R(S)RRR       | 1.000 × 10 <sup>5</sup> <sup>c</sup>  | 2.300 × 10 <sup>4</sup> <sup>c</sup>  | [49]      |
|             | (R)RRRR–(S)RRRR       | 1.000 × 10 <sup>5</sup> <sup>c</sup>  | 3.300 × 10 <sup>4</sup> <sup>c</sup>  | [49]      |
|             | (R)SSSR–(S)SSSR       | 3.600 × 10 <sup>4</sup> <sup>c</sup>  | 1.220 × 10 <sup>1</sup> <sup>c</sup>  | [49]      |
|             | RSR(R)R–RSR(S)R       | 2.300 × 10 <sup>4</sup> <sup>c</sup>  | 4.700 × 10 <sup>4</sup> <sup>c</sup>  | [49]      |
| <b>hACE</b> | RSR(R)S–RSR(S)S       | 1.000 × 10 <sup>5</sup> <sup>c</sup>  | 6.000 × 10 <sup>4</sup> <sup>c</sup>  | [49]      |
|             | 4a(2R,3R)–4b(2S,3S)   | 8.000 × 10 <sup>-2</sup> <sup>b</sup> | 1.600 × 10 <sup>-2</sup> <sup>b</sup> | [41]      |
|             | 4c(2S,3R)–4d(2R,3S)   | 4.200 × 10 <sup>-3</sup> <sup>b</sup> | 9.500 × 10 <sup>-2</sup> <sup>b</sup> | [41]      |
|             | 8b(2R,3R)–8a(2S,3S)   | 2.400 × 10 <sup>-2</sup> <sup>b</sup> | 7.000 × 10 <sup>-2</sup> <sup>b</sup> | [45]      |
|             | 8c(2S,3R)–8d(2R,3S)   | 4.600 × 10 <sup>-3</sup> <sup>b</sup> | 3.000 × 10 <sup>-2</sup> <sup>b</sup> | [45]      |
|             | 15b(2R,3R)–15a(2S,3S) | 5.500 × 10 <sup>-2</sup> <sup>b</sup> | 5.800 × 10 <sup>-2</sup> <sup>b</sup> | [45]      |
|             | 15c(2S,3R)–15d(2R,3S) | 4.100 × 10 <sup>-3</sup> <sup>b</sup> | 6.600 × 10 <sup>-2</sup> <sup>b</sup> | [45]      |
|             | 9b(2R3R)–9a(2S3S)     | 3.300 × 10 <sup>-2</sup> <sup>b</sup> | 2.900 × 10 <sup>-2</sup> <sup>b</sup> | [44]      |
|             | 9c(2S3R)–9d(2R3S)     | 1.500 × 10 <sup>-2</sup> <sup>b</sup> | 2.900 × 10 <sup>-1</sup> <sup>b</sup> | [44]      |
|             | 10a(2S3S)–10b(2R3R)   | 6.500 × 10 <sup>-2</sup> <sup>b</sup> | 1.300 × 10 <sup>-1</sup> <sup>b</sup> | [44]      |
|             | 10c(2S3R)–10d(2R3S)   | 3.800 × 10 <sup>-2</sup> <sup>b</sup> | 3.300 × 10 <sup>-1</sup> <sup>b</sup> | [44]      |
|             | 13b(2R3R)–13a(2S3S)   | 4.300 × 10 <sup>-2</sup> <sup>b</sup> | 4.100 × 10 <sup>-2</sup> <sup>b</sup> | [44]      |
|             | 13c(2S3R)–13d(2R3S)   | 1.000 × 10 <sup>-2</sup> <sup>b</sup> | 1.700 × 10 <sup>-1</sup> <sup>b</sup> | [44]      |
|             | 14b(2R3R)–14a(2S3S)   | 7.600 × 10 <sup>-2</sup> <sup>b</sup> | 2.600 × 10 <sup>-2</sup> <sup>b</sup> | [44]      |
|             | 14c(2S3R)–14d(2R3S)   | 1.000 × 10 <sup>-2</sup> <sup>b</sup> | 1.340 × 10 <sup>-1</sup> <sup>b</sup> | [44]      |
|             | 5f1–5f2               | 1.400 × 10 <sup>-3</sup> <sup>b</sup> | 3.600 × 10 <sup>-2</sup> <sup>b</sup> | [46]      |
|             | 7f1–7f2               | 4.000 × 10 <sup>-4</sup> <sup>b</sup> | 3.800 × 10 <sup>-3</sup> <sup>b</sup> | [46]      |
|             | 8f1–8f2               | 4.100 × 10 <sup>-4</sup> <sup>b</sup> | 6.500 × 10 <sup>-4</sup> <sup>b</sup> | [46]      |

Table S1. Cont.

| Target                | Compound ID           | Activity                            |                                     | Reference          |
|-----------------------|-----------------------|-------------------------------------|-------------------------------------|--------------------|
|                       |                       | R/(+)                               | S/(-)                               |                    |
| hNEP                  | 4a(2R,3R)–4b(2S,3S)   | $2.300 \times 10^{-3}$ <sup>b</sup> | $2.100 \times 10^{-3}$ <sup>b</sup> | [41]               |
|                       | 4c(2S,3R)–4d(2R,3S)   | $1.700 \times 10^{-3}$ <sup>b</sup> | $7.000 \times 10^{-4}$ <sup>b</sup> | [41]               |
|                       | 8b(2R,3R)–8a(2S,3S)   | $1.300 \times 10^{-3}$ <sup>b</sup> | $3.000 \times 10^{-2}$ <sup>b</sup> | [45]               |
|                       | 8c(2S,3R)–8d(2R,3S)   | $2.700 \times 10^{-3}$ <sup>b</sup> | $1.500 \times 10^{-2}$ <sup>b</sup> | [45]               |
|                       | 15b(2R,3R)–15a(2S,3S) | $1.800 \times 10^{-3}$ <sup>b</sup> | $9.400 \times 10^{-3}$ <sup>b</sup> | [45]               |
|                       | 15c(2S,3R)–15d(2R,3S) | $3.800 \times 10^{-3}$ <sup>b</sup> | $1.300 \times 10^{-2}$ <sup>b</sup> | [45]               |
|                       | 9b(2R3R)–9a(2S3S)     | $2.400 \times 10^{-3}$ <sup>b</sup> | $2.200 \times 10^{-3}$ <sup>b</sup> | [44]               |
|                       | 9c(2S3R)–9d(2R3S)     | $2.500 \times 10^{-3}$ <sup>b</sup> | $5.000 \times 10^{-3}$ <sup>b</sup> | [44]               |
|                       | 10a(2S3S)–10b(2R3R)   | $3.000 \times 10^{-2}$ <sup>b</sup> | $1.500 \times 10^{-3}$ <sup>b</sup> | [44]               |
|                       | 10c(2S3R)–10d(2R3S)   | $3.500 \times 10^{-4}$ <sup>b</sup> | $5.000 \times 10^{-3}$ <sup>b</sup> | [44]               |
|                       | 13b(2R3R)–13a(2S3S)   | $7.000 \times 10^{-4}$ <sup>b</sup> | $1.000 \times 10^{-2}$ <sup>b</sup> | [44]               |
|                       | 13c(2S3R)–13d(2R3S)   | $2.100 \times 10^{-3}$ <sup>b</sup> | $2.700 \times 10^{-2}$ <sup>b</sup> | [44]               |
|                       | 14b(2R3R)–14a(2S3S)   | $3.000 \times 10^{-3}$ <sup>b</sup> | $8.000 \times 10^{-3}$ <sup>b</sup> | [44]               |
|                       | 14c(2S3R)–14d(2R3S)   | $3.000 \times 10^{-3}$ <sup>b</sup> | $4.300 \times 10^{-2}$ <sup>b</sup> | [44]               |
|                       | 5f1–5f2               | $1.300 \times 10^{-1}$ <sup>b</sup> | 1.850 <sup>b</sup>                  | [46]               |
|                       | 7f1–7f2               | $6.800 \times 10^{-2}$ <sup>b</sup> | $1.000 \times 10^2$ <sup>b</sup>    | [46]               |
|                       | 8f1–8f2               | $1.720 \times 10^{-1}$ <sup>b</sup> | 6.700 <sup>b</sup>                  | [46]               |
|                       | hECE                  | 8b(2R,3R)–8a(2S,3S)                 | $1.000 \times 10^{-2}$ <sup>b</sup> | 1.460 <sup>b</sup> |
| 8c(2S,3R)–8d(2R,3S)   |                       | $1.000 \times 10^{-1}$ <sup>b</sup> | $1.800 \times 10^{-1}$ <sup>b</sup> | [45]               |
| 15b(2R,3R)–15a(2S,3S) |                       | $1.800 \times 10^{-2}$ <sup>b</sup> | $1.100 \times 10^{-1}$ <sup>b</sup> | [45]               |
| 15c(2S,3R)–15d(2R,3S) |                       | $2.800 \times 10^{-2}$ <sup>b</sup> | $9.000 \times 10^{-2}$ <sup>b</sup> | [45]               |
| 9b(2R3R)–9a(2S3S)     |                       | $2.000 \times 10^{-1}$ <sup>b</sup> | $1.000 \times 10^{-1}$ <sup>b</sup> | [44]               |
| 9c(2S3R)–9d(2R3S)     |                       | $7.800 \times 10^{-1}$ <sup>b</sup> | $5.800 \times 10^{-1}$ <sup>b</sup> | [44]               |
| 10a(2S3S)–10b(2R3R)   |                       | $1.100 \times 10^{-1}$ <sup>b</sup> | $1.350 \times 10^{-1}$ <sup>b</sup> | [44]               |
| 10c(2S3R)–10d(2R3S)   |                       | $9.200 \times 10^{-1}$ <sup>b</sup> | $1.900 \times 10^{-1}$ <sup>b</sup> | [44]               |
| 13b(2R3R)–13a(2S3S)   |                       | $2.600 \times 10^{-2}$ <sup>b</sup> | 1.140 <sup>b</sup>                  | [44]               |
| 13c(2S3R)–13d(2R3S)   |                       | $2.900 \times 10^{-1}$ <sup>b</sup> | 6.800 <sup>b</sup>                  | [44]               |
| 14b(2R3R)–14a(2S3S)   |                       | $2.500 \times 10^{-1}$ <sup>b</sup> | 6.700 <sup>b</sup>                  | [44]               |
| 14c(2S3R)–14d(2R3S)   |                       | $1.900 \times 10^{-1}$ <sup>b</sup> | 1.240 <sup>b</sup>                  | [44]               |
| 5f1–5f2               |                       | $2.600 \times 10^{-2}$ <sup>b</sup> | $8.000 \times 10^{-3}$ <sup>b</sup> | [46]               |
| 7f1–7f2               |                       | $2.400 \times 10^{-1}$ <sup>b</sup> | $7.700 \times 10^{-3}$ <sup>b</sup> | [46]               |
| 8f1–8f2               |                       | $2.750 \times 10^{-1}$ <sup>b</sup> | $1.400 \times 10^{-2}$ <sup>b</sup> | [46]               |

<sup>a</sup>  $k_i$  ( $M^{-1} \cdot \text{min}^{-1}$ ); <sup>b</sup>  $K_i$  ( $\mu\text{M}$ ); <sup>c</sup>  $\text{IC}_{50}$  (nM); <sup>d</sup> % inhibitory activity (1.2 mM).

**Table S2.** Ligand dataset collection of ligands with different molecular weights.

| Target | Compound                                                                        | Activity              |                          | Reference |
|--------|---------------------------------------------------------------------------------|-----------------------|--------------------------|-----------|
|        |                                                                                 | Lower $M_w$           | Higher $M_w$             |           |
| hAChE  | (S)-EMP-CHMC-(S)-nPrMP-CHMC                                                     | $2.800 \times 10^7$ a | $1.580 \times 10^8$ a    | [33]      |
|        | (R)-EMP-CHMC-(R)-nPrMP-CHMC                                                     | $1.200 \times 10^6$ a | $6.100 \times 10^6$ a    | [33]      |
|        | (S)-Cycloheptyl-CH <sub>3</sub> -(S)-Cycloheptyl-C <sub>2</sub> H <sub>5</sub>  | $2.200 \times 10^5$ a | $6.500 \times 10^4$ a    | [35]      |
|        | (S)-Cycloheptyl-CH <sub>3</sub> -(S)-Cycloheptyl-C <sub>4</sub> H <sub>9</sub>  | $2.200 \times 10^5$ a | $9.400 \times 10^4$ a    | [35]      |
|        | (S)-Cycloheptyl-CH <sub>3</sub> -(S)-Cycloheptyl-C <sub>5</sub> H <sub>11</sub> | $2.200 \times 10^5$ a | $3.400 \times 10^5$ a    | [35]      |
|        | (S)-Cycloheptyl-CH <sub>3</sub> -(S)-Cycloheptyl-C <sub>6</sub> H <sub>13</sub> | $2.200 \times 10^5$ a | $2.900 \times 10^5$ a    | [35]      |
|        | (R)-Cycloheptyl-CH <sub>3</sub> -(R)-Cycloheptyl-C <sub>2</sub> H <sub>5</sub>  | $7.600 \times 10^2$ a | $1.400 \times 10^1$ a    | [35]      |
|        | (R)-Cycloheptyl-CH <sub>3</sub> -(R)-Cycloheptyl-C <sub>4</sub> H <sub>9</sub>  | $7.600 \times 10^2$ a | $3.200 \times 10^1$ a    | [35]      |
|        | (R)-Cycloheptyl-CH <sub>3</sub> -(R)-Cycloheptyl-C <sub>5</sub> H <sub>11</sub> | $7.600 \times 10^2$ a | $1.290 \times 10^2$ a    | [35]      |
|        | (R)-Cycloheptyl-CH <sub>3</sub> -(R)-Cycloheptyl-C <sub>6</sub> H <sub>13</sub> | $7.600 \times 10^2$ a | $1.140 \times 10^2$ a    | [35]      |
|        | 2a-2i                                                                           | $5.020 \times 10^1$ c | $6.400 \times 10^2$ c    | [63]      |
|        | 2b-2g                                                                           | $3.730 \times 10^1$ c | $2.090 \times 10^2$ c    | [63]      |
|        | 2b-2l                                                                           | $3.730 \times 10^1$ c | $4.150 \times 10^2$ c    | [63]      |
|        | 2c-2k                                                                           | $4.210 \times 10^1$ c | $2.770 \times 10^2$ c    | [63]      |
|        | 2c-2m                                                                           | $4.210 \times 10^1$ c | $4.810 \times 10^2$ c    | [63]      |
|        | 3a-3e                                                                           | $3.640 \times 10^2$ c | $1.730 \times 10^1$ c    | [63]      |
|        | 3a-3k                                                                           | $3.640 \times 10^2$ c | $5.290 \times 10^2$ c    | [63]      |
|        | 3b-3f                                                                           | $2.400 \times 10^2$ c | 4.160 c                  | [63]      |
|        | 3b-3l                                                                           | $2.400 \times 10^2$ c | $6.200 \times 10^1$ c    | [63]      |
|        | 3c-3g                                                                           | $2.800 \times 10^2$ c | $7.800 \times 10^{-1}$ c | [63]      |
|        | 3c-3m                                                                           | $2.800 \times 10^2$ c | $4.060 \times 10^1$ c    | [63]      |
|        | 3d-3h                                                                           | $3.160 \times 10^1$ c | 1.850 c                  | [63]      |
|        | 3d-3n                                                                           | $3.160 \times 10^1$ c | $3.760 \times 10^1$ c    | [63]      |
|        | 3a-3e                                                                           | $1.100 \times 10^3$ c | $2.280 \times 10^3$ c    | [64]      |
|        | 3b-3f                                                                           | $8.200 \times 10^2$ c | $1.360 \times 10^3$ c    | [64]      |
|        | 3c-3g                                                                           | $2.100 \times 10^2$ c | $1.000 \times 10^2$ c    | [64]      |
|        | 3d-3h                                                                           | $1.500 \times 10^2$ c | $2.200 \times 10^2$ c    | [64]      |
|        | 3i-3m                                                                           | $2.660 \times 10^3$ c | $3.180 \times 10^3$ c    | [64]      |
|        | 3j-3n                                                                           | $1.960 \times 10^3$ c | $3.580 \times 10^3$ c    | [64]      |
|        | 3k-3o                                                                           | $5.000 \times 10^1$ c | $1.500 \times 10^2$ c    | [64]      |
|        | 3l-3p                                                                           | $1.400 \times 10^3$ c | $1.300 \times 10^2$ c    | [64]      |
|        | 1a-1c                                                                           | $2.140 \times 10^3$ c | $4.900 \times 10^2$ c    | [65]      |
|        | 1a-1f                                                                           | $2.140 \times 10^3$ c | $4.400 \times 10^2$ c    | [65]      |
|        | 1b-1d                                                                           | $4.200 \times 10^2$ c | $2.700 \times 10^2$ c    | [65]      |
|        | 1b-1g                                                                           | $4.200 \times 10^2$ c | $3.500 \times 10^1$ c    | [65]      |
|        | 1c-1f                                                                           | $4.900 \times 10^2$ c | $4.400 \times 10^2$ c    | [65]      |
|        | 1d-1g                                                                           | $2.700 \times 10^2$ c | $3.500 \times 10^1$ c    | [65]      |
|        | 1j-1n                                                                           | $2.400 \times 10^2$ c | $1.600 \times 10^2$ c    | [65]      |
|        | 1k-1o                                                                           | $4.500 \times 10^1$ c | $1.000 \times 10^2$ c    | [65]      |
|        | 1m-1p                                                                           | $2.900 \times 10^2$ c | $8.200 \times 10^1$ c    | [65]      |
|        | 2a-2c                                                                           | $3.740 \times 10^3$ c | $6.900 \times 10^2$ c    | [65]      |
|        | 2a-2f                                                                           | $3.740 \times 10^3$ c | $1.480 \times 10^3$ c    | [65]      |
|        | 2b-2d                                                                           | $1.380 \times 10^3$ c | $3.800 \times 10^2$ c    | [65]      |
|        | 2b-2g                                                                           | $1.380 \times 10^3$ c | $2.900 \times 10^2$ c    | [65]      |
|        | 2c-2f                                                                           | $6.900 \times 10^2$ c | $1.480 \times 10^3$ c    | [65]      |
|        | 2d-2g                                                                           | $3.800 \times 10^2$ c | $2.900 \times 10^2$ c    | [65]      |
|        | 2e-2i                                                                           | $1.540 \times 10^3$ c | $1.070 \times 10^3$ c    | [65]      |
| 2j-2n  | $2.580 \times 10^3$ c                                                           | $6.600 \times 10^2$ c | [65]                     |           |
| 2k-2o  | $1.500 \times 10^2$ c                                                           | $1.200 \times 10^2$ c | [65]                     |           |

Table S2. Cont.

| Target | Compound | Activity              |                       | Reference |
|--------|----------|-----------------------|-----------------------|-----------|
|        |          | Lower $M_w$           | Higher $M_w$          |           |
| hBuChE | 2a–2i    | $5.114 \times 10^3$ c | $2.794 \times 10^3$ c | [63]      |
|        | 2b–2g    | $3.045 \times 10^4$ c | $2.337 \times 10^3$ c | [63]      |
|        | 2b–2l    | $3.045 \times 10^4$ c | $3.224 \times 10^3$ c | [63]      |
|        | 2c–2k    | $1.658 \times 10^4$ c | $3.986 \times 10^3$ c | [63]      |
|        | 2c–2m    | $1.658 \times 10^4$ c | $3.256 \times 10^3$ c | [63]      |
|        | 3a–3e    | $1.663 \times 10^3$ c | $3.229 \times 10^3$ c | [63]      |
|        | 3a–3k    | $1.663 \times 10^3$ c | $8.973 \times 10^3$ c | [63]      |
|        | 3b–3f    | $1.722 \times 10^3$ c | $6.039 \times 10^3$ c | [63]      |
|        | 3b–3l    | $1.722 \times 10^3$ c | $2.930 \times 10^3$ c | [63]      |
|        | 3c–3g    | $2.428 \times 10^3$ c | $1.520 \times 10^3$ c | [63]      |
|        | 3c–3m    | $2.428 \times 10^3$ c | $3.756 \times 10^4$ c | [63]      |
|        | 3d–3h    | $5.880 \times 10^2$ c | $4.509 \times 10^3$ c | [63]      |
|        | 3d–3n    | $5.880 \times 10^2$ c | $2.687 \times 10^4$ c | [63]      |
|        | 3a–3e    | $2.070 \times 10^5$ c | $1.900 \times 10^5$ c | [64]      |
|        | 3b–3f    | $2.880 \times 10^5$ c | $1.990 \times 10^5$ c | [64]      |
|        | 3c–3g    | $1.980 \times 10^6$ c | $2.510 \times 10^5$ c | [64]      |
|        | 3d–3h    | $1.370 \times 10^6$ c | $2.340 \times 10^5$ c | [64]      |
|        | 3i–3m    | $3.950 \times 10^4$ c | $5.550 \times 10^4$ c | [64]      |
|        | 3j–3n    | $2.120 \times 10^5$ c | $1.580 \times 10^5$ c | [64]      |
|        | 3k–3o    | $8.430 \times 10^4$ c | $2.620 \times 10^5$ c | [64]      |
|        | 3l–3p    | $1.300 \times 10^5$ c | $1.760 \times 10^5$ c | [64]      |
|        | 1a–1c    | $8.930 \times 10^4$ c | $3.680 \times 10^4$ c | [65]      |
|        | 1a–1f    | $8.930 \times 10^4$ c | $7.100 \times 10^4$ c | [65]      |
|        | 1b–1d    | $3.150 \times 10^5$ c | $2.010 \times 10^4$ c | [65]      |
|        | 1b–1g    | $3.150 \times 10^5$ c | $8.200 \times 10^4$ c | [65]      |
|        | 1c–1f    | $3.680 \times 10^4$ c | $7.100 \times 10^4$ c | [65]      |
|        | 1d–1g    | $2.010 \times 10^4$ c | $8.200 \times 10^4$ c | [65]      |
|        | 1j–1n    | $4.160 \times 10^4$ c | $5.520 \times 10^4$ c | [65]      |
|        | 1k–1o    | $2.660 \times 10^4$ c | $8.460 \times 10^4$ c | [65]      |
|        | 2a–2c    | $2.520 \times 10^4$ c | $1.850 \times 10^4$ c | [65]      |
|        | 2a–2f    | $2.520 \times 10^4$ c | $3.200 \times 10^4$ c | [65]      |
|        | 2b–2d    | $4.070 \times 10^4$ c | $3.450 \times 10^1$ c | [65]      |
|        | 2b–2g    | $4.070 \times 10^4$ c | $1.170 \times 10^4$ c | [65]      |
|        | 2c–2f    | $1.850 \times 10^4$ c | $3.200 \times 10^4$ c | [65]      |
|        | 2d–2g    | $3.450 \times 10^4$ c | $1.170 \times 10^4$ c | [65]      |
|        | 2j–2n    | $4.220 \times 10^4$ c | $7.040 \times 10^4$ c | [65]      |
|        | 2k–2o    | $3.320 \times 10^4$ c | $4.830 \times 10^4$ c | [65]      |

Table S2. Cont.

| Target | Compound   | Activity                 |                          | Reference |
|--------|------------|--------------------------|--------------------------|-----------|
|        |            | Lower $M_w$              | Higher $M_w$             |           |
| hMAO-A | 2-3        | $1.923 \times 10^4$ c    | $4.310 \times 10^3$ c    | [61]      |
|        | 2a-4a      | $1.200 \times 10^1$ c    | $4.100 \times 10^1$ c    | [66]      |
|        | 5a-6a      | 3.600 c                  | $1.600 \times 10^{-3}$ c | [66]      |
|        | 5b-6b      | $2.700 \times 10^{-1}$ c | $8.900 \times 10^1$ c    | [66]      |
|        | Harmine-3a | $1.690 \times 10^1$ b    | 5.000 b                  | [62]      |
|        | Harmine-3b | $1.690 \times 10^1$ b    | 3.900 b                  | [62]      |
|        | Harmine-3c | $1.690 \times 10^1$ b    | $2.950 \times 10^1$ b    | [62]      |
|        | Harmine-3e | $1.690 \times 10^1$ b    | 3.600 b                  | [62]      |
|        | Harmine-3f | $1.690 \times 10^1$ b    | 4.300 b                  | [62]      |
|        | Harmine-3g | $1.690 \times 10^1$ b    | $1.260 \times 10^1$ b    | [62]      |
|        | Harmine-3h | $1.690 \times 10^1$ b    | 5.000 b                  | [62]      |
|        | 3a-3b      | 5.000 b                  | 3.900 b                  | [62]      |
|        | 3a-3c      | 5.000 b                  | $2.950 \times 10^1$ b    | [62]      |
|        | 3a-3e      | 5.000 b                  | 3.600 b                  | [62]      |
|        | 3a-3f      | 5.000 b                  | 4.300 b                  | [62]      |
|        | 3a-3g      | 5.000 b                  | $1.260 \times 10^1$ b    | [62]      |
|        | 3a-3h      | 5.000 b                  | 5.000 b                  | [62]      |
|        | 3b-3c      | 3.900 b                  | $2.950 \times 10^1$ b    | [62]      |
|        | 3b-3e      | 3.900 b                  | 3.600 b                  | [62]      |
|        | 3b-3f      | 3.900 b                  | 4.300 b                  | [62]      |
|        | 3b-3g      | 3.900 b                  | $1.260 \times 10^1$ b    | [62]      |
|        | 3b-3h      | 3.900 b                  | 5.000 b                  | [62]      |
|        | 3c-3e      | $2.950 \times 10^1$ b    | 3.600 b                  | [62]      |
|        | 3c-3f      | $2.950 \times 10^1$ b    | 4.300 b                  | [62]      |
|        | 3c-3g      | $2.950 \times 10^1$ b    | $1.260 \times 10^1$ b    | [62]      |
|        | 3c-3h      | $2.950 \times 10^1$ b    | 5.000 b                  | [62]      |
|        | 3e-3f      | 3.600 b                  | 4.300 b                  | [62]      |
|        | 3e-3g      | 3.600 b                  | $1.260 \times 10^1$ b    | [62]      |
|        | 3e-3h      | 3.600 b                  | 5.000 b                  | [62]      |
|        | 3f-3g      | 4.300 b                  | $1.260 \times 10^1$ b    | [62]      |
|        | 3f-3h      | 4.300 b                  | 5.000 b                  | [62]      |
|        | 3g-3h      | $1.260 \times 10^1$ b    | 5.000 b                  | [62]      |
|        | 2-3        | 8.310 c                  | $3.803 \times 10^1$ c    | [61]      |
|        | 2a-4a      | 6.400 c                  | $1.900 \times 10^2$ c    | [66]      |
|        | 5a-6a      | 4.900 c                  | 3.700 c                  | [66]      |
|        | 5b-6b      | $1.000 \times 10^1$ c    | 4.800 c                  | [66]      |
|        | 4a-5a      | $4.780 \times 10^1$ b    | $2.490 \times 10^1$ b    | [36]      |
|        | 4b-5b      | $1.490 \times 10^2$ b    | $4.490 \times 10^1$ b    | [36]      |
|        | Harmine-3f | $1.208 \times 10^5$ b    | $2.216 \times 10^2$ b    | [62]      |

Table S2. Cont.

| Target | Compound | Activity              |                       | Reference |
|--------|----------|-----------------------|-----------------------|-----------|
|        |          | Lower $M_w$           | Higher $M_w$          |           |
| hACE   | 5-7      | $7.700 \times 10^1$ b | $1.500 \times 10^2$ b | [44]      |
|        | 5-8      | $7.700 \times 10^1$ b | $2.500 \times 10^2$ b | [44]      |
|        | 5-9      | $7.700 \times 10^1$ b | $4.000 \times 10^1$ b | [44]      |
|        | 5-10     | $7.700 \times 10^1$ b | $6.200 \times 10^1$ b | [44]      |
|        | 5-11     | $7.700 \times 10^1$ b | $4.700 \times 10^1$ b | [44]      |
|        | 5-13     | $7.700 \times 10^1$ b | $2.000 \times 10^1$ b | [44]      |
|        | 5-14     | $7.700 \times 10^1$ b | $1.800 \times 10^1$ b | [44]      |
|        | 7-8      | $1.500 \times 10^2$ b | $2.500 \times 10^2$ b | [44]      |
|        | 7-9      | $1.500 \times 10^2$ b | $4.000 \times 10^1$ b | [44]      |
|        | 7-10     | $1.500 \times 10^2$ b | $6.200 \times 10^1$ b | [44]      |
|        | 7-11     | $1.500 \times 10^2$ b | $4.700 \times 10^1$ b | [44]      |
|        | 7-13     | $1.500 \times 10^2$ b | $2.000 \times 10^1$ b | [44]      |
|        | 7-14     | $1.500 \times 10^2$ b | $1.800 \times 10^1$ b | [44]      |
|        | 8-9      | $2.500 \times 10^2$ b | $4.000 \times 10^1$ b | [44]      |
|        | 8-10     | $2.500 \times 10^2$ b | $6.200 \times 10^1$ b | [44]      |
|        | 8-11     | $2.500 \times 10^2$ b | $4.700 \times 10^1$ b | [44]      |
|        | 8-13     | $2.500 \times 10^2$ b | $2.000 \times 10^1$ b | [44]      |
|        | 8-14     | $2.500 \times 10^2$ b | $1.800 \times 10^1$ b | [44]      |
|        | 9-10     | $4.000 \times 10^1$ b | $6.200 \times 10^1$ b | [44]      |
|        | 9-11     | $4.000 \times 10^1$ b | $4.700 \times 10^1$ b | [44]      |
|        | 9-13     | $4.000 \times 10^1$ b | $2.000 \times 10^1$ b | [44]      |
|        | 9-14     | $4.000 \times 10^1$ b | $1.800 \times 10^1$ b | [44]      |
|        | 10-11    | $6.200 \times 10^1$ b | $4.700 \times 10^1$ b | [44]      |
|        | 10-13    | $6.200 \times 10^1$ b | $2.000 \times 10^1$ b | [44]      |
|        | 10-14    | $6.200 \times 10^1$ b | $1.800 \times 10^1$ b | [44]      |
|        | 11-13    | $4.700 \times 10^1$ b | $2.000 \times 10^1$ b | [44]      |
|        | 11-14    | $4.700 \times 10^1$ b | $1.800 \times 10^1$ b | [44]      |
|        | 13-14    | $2.000 \times 10^1$ b | $1.800 \times 10^1$ b | [44]      |



Table S2. Cont.

| Target | Compound                         | Activity                         |                                  | Reference |
|--------|----------------------------------|----------------------------------|----------------------------------|-----------|
|        |                                  | Lower $M_w$                      | Higher $M_w$                     |           |
| hNEP   | 5-7                              | $1.350 \times 10^2$ <sup>b</sup> | $2.200 \times 10^1$ <sup>b</sup> | [44]      |
|        | 5-8                              | $1.350 \times 10^2$ <sup>b</sup> | $1.400 \times 10^2$ <sup>b</sup> | [44]      |
|        | 5-9                              | $1.350 \times 10^2$ <sup>b</sup> | 3.000 <sup>b</sup>               | [44]      |
|        | 5-10                             | $1.350 \times 10^2$ <sup>b</sup> | 4.800 <sup>b</sup>               | [44]      |
|        | 5-11                             | $1.350 \times 10^2$ <sup>b</sup> | 5.400 <sup>b</sup>               | [44]      |
|        | 5-13                             | $1.350 \times 10^2$ <sup>b</sup> | 1.800 <sup>b</sup>               | [44]      |
|        | 5-14                             | $1.350 \times 10^2$ <sup>b</sup> | 4.500 <sup>b</sup>               | [44]      |
|        | 7-8                              | $2.200 \times 10^1$ <sup>b</sup> | $1.400 \times 10^2$ <sup>b</sup> | [44]      |
|        | 7-9                              | $2.200 \times 10^1$ <sup>b</sup> | 3.000 <sup>b</sup>               | [44]      |
|        | 7-10                             | $2.200 \times 10^1$ <sup>b</sup> | 4.800 <sup>b</sup>               | [44]      |
|        | 7-11                             | $2.200 \times 10^1$ <sup>b</sup> | 5.400 <sup>b</sup>               | [44]      |
|        | 7-13                             | $2.200 \times 10^1$ <sup>b</sup> | 1.800 <sup>b</sup>               | [44]      |
|        | 7-14                             | $2.200 \times 10^1$ <sup>b</sup> | 4.500 <sup>b</sup>               | [44]      |
|        | 8-9                              | $1.400 \times 10^2$ <sup>b</sup> | 3.000 <sup>b</sup>               | [44]      |
|        | 8-10                             | $1.400 \times 10^2$ <sup>b</sup> | 4.800 <sup>b</sup>               | [44]      |
|        | 8-11                             | $1.400 \times 10^2$ <sup>b</sup> | 5.400 <sup>b</sup>               | [44]      |
|        | 8-13                             | $1.400 \times 10^2$ <sup>b</sup> | 1.800 <sup>b</sup>               | [44]      |
|        | 8-14                             | $1.400 \times 10^2$ <sup>b</sup> | 4.500 <sup>b</sup>               | [44]      |
|        | 9-10                             | 3.000 <sup>b</sup>               | 4.800 <sup>b</sup>               | [44]      |
|        | 9-11                             | 3.000 <sup>b</sup>               | 5.400 <sup>b</sup>               | [44]      |
|        | 9-13                             | 3.000 <sup>b</sup>               | 1.800 <sup>b</sup>               | [44]      |
|        | 9-14                             | 3.000 <sup>b</sup>               | 4.500 <sup>b</sup>               | [44]      |
|        | 10-11                            | 4.800 <sup>b</sup>               | 5.400 <sup>b</sup>               | [44]      |
|        | 10-13                            | 4.800 <sup>b</sup>               | 1.800 <sup>b</sup>               | [44]      |
| 10-14  | 4.800 <sup>b</sup>               | 4.500 <sup>b</sup>               | [44]                             |           |
| 11-13  | 5.400 <sup>b</sup>               | 1.800 <sup>b</sup>               | [44]                             |           |
| 11-14  | 5.400 <sup>b</sup>               | 4.500 <sup>b</sup>               | [44]                             |           |
| 13-14  | 1.800 <sup>b</sup>               | 4.500 <sup>b</sup>               | [44]                             |           |
| hECE   | 5-7                              | $4.150 \times 10^3$ <sup>b</sup> | $1.560 \times 10^3$ <sup>b</sup> | [44]      |
|        | 5-9                              | $4.150 \times 10^3$ <sup>b</sup> | $3.000 \times 10^2$ <sup>b</sup> | [44]      |
|        | 5-10                             | $4.150 \times 10^3$ <sup>b</sup> | $2.200 \times 10^2$ <sup>b</sup> | [44]      |
|        | 5-11                             | $4.150 \times 10^3$ <sup>b</sup> | $9.800 \times 10^2$ <sup>b</sup> | [44]      |
|        | 5-13                             | $4.150 \times 10^3$ <sup>b</sup> | $6.000 \times 10^2$ <sup>b</sup> | [44]      |
|        | 5-14                             | $4.150 \times 10^3$ <sup>b</sup> | $3.000 \times 10^2$ <sup>b</sup> | [44]      |
|        | 7-9                              | $1.560 \times 10^3$ <sup>b</sup> | $3.000 \times 10^2$ <sup>b</sup> | [44]      |
|        | 7-10                             | $1.560 \times 10^3$ <sup>b</sup> | $2.200 \times 10^2$ <sup>b</sup> | [44]      |
|        | 7-11                             | $1.560 \times 10^3$ <sup>b</sup> | $9.800 \times 10^2$ <sup>b</sup> | [44]      |
|        | 7-13                             | $1.560 \times 10^3$ <sup>b</sup> | $6.000 \times 10^2$ <sup>b</sup> | [44]      |
|        | 7-14                             | $1.560 \times 10^3$ <sup>b</sup> | $3.000 \times 10^2$ <sup>b</sup> | [44]      |
|        | 9-10                             | $3.000 \times 10^2$ <sup>b</sup> | $2.200 \times 10^2$ <sup>b</sup> | [44]      |
|        | 9-11                             | $3.000 \times 10^2$ <sup>b</sup> | $9.800 \times 10^2$ <sup>b</sup> | [44]      |
|        | 9-13                             | $3.000 \times 10^2$ <sup>b</sup> | $6.000 \times 10^2$ <sup>b</sup> | [44]      |
|        | 9-14                             | $3.000 \times 10^2$ <sup>b</sup> | $3.000 \times 10^2$ <sup>b</sup> | [44]      |
|        | 10-11                            | $2.200 \times 10^2$ <sup>b</sup> | $9.800 \times 10^2$ <sup>b</sup> | [44]      |
|        | 10-13                            | $2.200 \times 10^2$ <sup>b</sup> | $6.000 \times 10^2$ <sup>b</sup> | [44]      |
| 10-14  | $2.200 \times 10^2$ <sup>b</sup> | $3.000 \times 10^2$ <sup>b</sup> | [44]                             |           |
| 11-13  | $9.800 \times 10^2$ <sup>b</sup> | $6.000 \times 10^2$ <sup>b</sup> | [44]                             |           |
| 11-14  | $9.800 \times 10^2$ <sup>b</sup> | $3.000 \times 10^2$ <sup>b</sup> | [44]                             |           |
| 13-14  | $6.000 \times 10^2$ <sup>b</sup> | $3.000 \times 10^2$ <sup>b</sup> | [44]                             |           |

<sup>a</sup>  $k_i$  ( $M^{-1} \cdot \text{min}^{-1}$ ); <sup>b</sup>  $K_i$  ( $\mu\text{M}$ ); <sup>c</sup>  $\text{IC}_{50}$  (nM).
